## Expression of Concern

# Expression of Concern: MicroRNA-26a reduces synovial inflammation and cartilage injury in osteoarthritis of knee joints through impairing the NF- $\kappa$ B signaling pathway

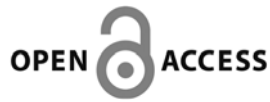

The Editorial Office has been made aware of potential issues surrounding the scientific validity of this paper, including duplications between the BMS-345541 panel of Figure 6D and the miR-26a mimics panel of figure 3D, one of which appears to be vertically flipped and the colour altered, as well as duplications found between cells on the Figure 4C miR-26a mimic panel and the Figure 7C BMS-345541 panel, which has also been vertically flipped. The authors have been contacted with regards to these concerns but have currently not responded to the Journal's queries.

Version of Record published:  
30 May 2022
